# Supplementary material for: Depressive Symptom Trajectories and Early Adult Education and Employment: Comparing Longitudinal Cohorts in Canada and the United States
Source: MDPI journal article supplement (doi:10.3390/ijerph18084279), 2021-04-17
Supplement: s1 [file s1]

## Depressive symptom trajectories and early adult education and employment: comparing longitudinal cohorts in Canada and the United States

### Supplementary File

Table S1. Comparison of variable derivation with the NLSY79 Child/YA and the NLSCY datasets<sup>a</sup>

| MEASURE                           | NLSY79 VARIABLE(S)                                                                                                                                                                                                                                                                                                                                             | NLSCY VARIABLE(S)                                                                                                                                                                                                                                      | STUDY DEFINITION                                                                                                                                                                                             |
|-----------------------------------|----------------------------------------------------------------------------------------------------------------------------------------------------------------------------------------------------------------------------------------------------------------------------------------------------------------------------------------------------------------|--------------------------------------------------------------------------------------------------------------------------------------------------------------------------------------------------------------------------------------------------------|--------------------------------------------------------------------------------------------------------------------------------------------------------------------------------------------------------------|
| <b>GENDER OF CHILD</b>            | Sex of child (Male/ Female)                                                                                                                                                                                                                                                                                                                                    | Gender of child (Male/ Female/ Not stated/ Refusal/ Don't know)                                                                                                                                                                                        | Male or Female                                                                                                                                                                                               |
| <b>RACE</b>                       | Source: NLSY79 Child/YA<br>Child race/ethnicity is based on the report of the mother and corresponds to the 'Racial/Ethnic Cohort from Screener' in the NLSY79 main Youth. This variable designates the respondent as "Hispanic," "black," or "nonblack/non-Hispanic"                                                                                          | How would you best describe his race or colour ... (White/ Chinese/ South Asian/ Black/ Native/ Arab/ Filipino/ Asian or South East Asian/ Latin American/ Japanese/ Korean/ Other)                                                                    | US: Hispanic/ Black/ Non-Black, non-Hispanic<br><br>Canada: White/ Person of Colour (Individuals who responded both White and another race or colour were considered in this study to be a Person of Colour) |
|                                   | Source: NLSY79 Child/YA                                                                                                                                                                                                                                                                                                                                        | Response options: Yes/ No/ Refusal<br><br>More than one option is possible                                                                                                                                                                             |                                                                                                                                                                                                              |
| <b>MOTHER'S MIGRATION HISTORY</b> | Country of birth of mother (In the US/ In another country)<br><br>Source: NLSY79 main                                                                                                                                                                                                                                                                          | (1) Immigration/ Official language status of the person-most-knowledgeable (PMK)<br>(1) Immigration/ Official language status of the spouse/partner<br>(2) Relationship of the PMK to the child<br>(3) Relationship of the spouse/partner to the child | Mother born in the US or Canada, respectively.<br><br>In Canada, mothers were considered to be born in Canada if they were Canadian by birth (i.e. not Canadian by naturalization)                           |
| <b>SINGLE PARENT HOUSEHOLD</b>    | Since the NLSY79 children eligible for interview in the survey are living at least part-time with their mothers, the mother's main Youth household record is used to describe the cross-sectional composition of the child's household.<br>(1) Is partner of mother present in household of mother?<br>(2) Is spouse of mother present in household of mother? | Child's parent status – Child lives with: Two parents/ One parent only/ Does not live with a parent/ Don't know/ Refusal                                                                                                                               | Whether child lives with one parent or two (in the US, specifically whether child lives with mother or both mother and her spouse/partner) in the survey year that the child was age 10 or 11.               |
| <b>MOTHER'S AGE</b>               | Source: NLSY79 Child/YA<br>Age of mother at date of child interview<br><br>Source: NLSY79 Child/YA                                                                                                                                                                                                                                                             | (1) Age of PMK<br>(2) Age of spouse/ partner of the PMK<br>(3) Relationship of the PMK to the child<br>(4) Relationship of the spouse/partner to the child                                                                                             | Age of the mother in the survey year that children were either age 10 or 11                                                                                                                                  |
| <b>RELATIVE INCOME (FAMILY)</b>   | What is your best estimate of the total income before taxes and deductions of all household members from all                                                                                                                                                                                                                                                   | Total net family income: These variables provide a composite income figure                                                                                                                                                                             | Percentile within the entire survey sample in which household income falls, in                                                                                                                               |

|                                   |                                                                                                                                                                                                                                                                                                                                                                                                                                 |                                                                                                                                                                                                                                                                                                                        |                                                                                                                                                                                                                                                                                         |
|-----------------------------------|---------------------------------------------------------------------------------------------------------------------------------------------------------------------------------------------------------------------------------------------------------------------------------------------------------------------------------------------------------------------------------------------------------------------------------|------------------------------------------------------------------------------------------------------------------------------------------------------------------------------------------------------------------------------------------------------------------------------------------------------------------------|-----------------------------------------------------------------------------------------------------------------------------------------------------------------------------------------------------------------------------------------------------------------------------------------|
|                                   | sources in the past 12 months, *that is the total income from all household members, before taxes and deductions?                                                                                                                                                                                                                                                                                                               | from a number of income values for household members related to the respondent by blood or marriage.                                                                                                                                                                                                                   | the survey year that children were either age 10 or 11.                                                                                                                                                                                                                                 |
|                                   | This variable contains imputed data.                                                                                                                                                                                                                                                                                                                                                                                            | This variable does not contain imputed data                                                                                                                                                                                                                                                                            |                                                                                                                                                                                                                                                                                         |
|                                   | Source: NLSY79 main                                                                                                                                                                                                                                                                                                                                                                                                             |                                                                                                                                                                                                                                                                                                                        |                                                                                                                                                                                                                                                                                         |
| <b>HIGHEST PARENTAL EDUCATION</b> | (1) Highest grade completed by mother as of May 1 of the survey year<br>(2) Highest grade completed by partner in household<br>(3) Highest grade completed by spouse in household                                                                                                                                                                                                                                               | (1) Highest level of education obtained by the PMK<br>(2) Highest level of education obtained by the spouse/partner                                                                                                                                                                                                    | The highest level of education attained by either the mother or PMK and the spouse/partner in the year that children were either age 10 or 11. Three categories: less than high school/ high school graduation/ more than high school.                                                  |
|                                   | Source: NLSY79 Child/YA                                                                                                                                                                                                                                                                                                                                                                                                         |                                                                                                                                                                                                                                                                                                                        |                                                                                                                                                                                                                                                                                         |
| <b>PARENTAL UNEMPLOYMENT</b>      | (1) Number of weeks worked in past calendar year<br>(2) Percent of weeks unaccounted for in calculating weeks worked in past calendar year                                                                                                                                                                                                                                                                                      | (1) Worked for pay in the past 12 months -- PMK<br>(2) Worked for pay in the past 12 months – spouse/partner                                                                                                                                                                                                           | Households were considered to have experienced unemployment if neither the child's mother or PMK, or the spouse/partner worked for pay in the past 12 months (defined as any work between 1 and 52 weeks in the US).                                                                    |
|                                   | Source: NLSY79 main                                                                                                                                                                                                                                                                                                                                                                                                             |                                                                                                                                                                                                                                                                                                                        |                                                                                                                                                                                                                                                                                         |
|                                   |                                                                                                                                                                                                                                                                                                                                                                                                                                 |                                                                                                                                                                                                                                                                                                                        | Individuals in the US were coded as missing on this variable if more than 10% of weeks in the calendar year were unaccounted for US: as the reported region in the survey year that children were either age 10 or 11                                                                   |
| <b>REGION OF RESIDENCE</b>        | Region of current residence (Northeast/ North Central/ South/ West)                                                                                                                                                                                                                                                                                                                                                             | Province of residence                                                                                                                                                                                                                                                                                                  | Canada: Six-category variable (Atlantic provinces/ Quebec/ Ontario/ Manitoba and Saskatchewan/ Alberta/ British Columbia). Individuals living in the Northern Territories, and outside Canada were recoded as missing to comply with Statistics Canada guidelines for small cell sizes. |
| <b>URBANICITY</b>                 | Through 1996, this series was based on the respondent's State and county of residence and the "% urban population" data from the County & City Data Book. From 1998-2002 this item was based on whether the respondent was living in an urbanized area or in area with a population greater than 2,500. Beginning in 2004, this item indicates whether the respondent resides within areas of higher population density i.e. an | Size of are of residence in which child lives, according to the 1996 or 2001 Census.<br><br>Response options:<br><ul style="list-style-type: none"> <li>• Rural area</li> <li>• Urban, population &lt; 30,000</li> <li>• Urban, population 30,000 to 99,999</li> <li>• Urban, population 100,000 to 499,999</li> </ul> | Urban or rural (based on the survey definition)                                                                                                                                                                                                                                         |

urbanized area or a place with a  
population of 2500 or more.

- Urban, population  
500,000 or over

---

<sup>a</sup>NLSY79 – National Longitudinal Survey on Youth 1979, NLSCY – National Longitudinal Survey on Children and Youth, YA – Young adult, PMK – Person-most-knowledgeable

Table S2. Growth parameters, probabilities of group membership, and proportions for a four-class growth mixture model of depressive symptoms with random intercepts in the United States (top) and Canada (bottom).

| USA        |       |       |       |          |      |      |                                         |                 |
|------------|-------|-------|-------|----------|------|------|-----------------------------------------|-----------------|
| Parameter  | Mean  | LCI   | UCI   | Variance | LCI  | UCI  | Average probability of group membership | Sample size (%) |
| Low-stable |       |       |       |          |      |      | 0.88                                    | 4716 (77.6)     |
| Intercept  | 2.76  | 2.62  | 2.88  | 0.79     | 0.62 | 0.95 |                                         |                 |
| Slope      | -0.00 | -0.07 | 0.06  | 0.00     | 0.00 | 0.00 |                                         |                 |
| Quadratic  | -0.01 | -0.01 | 0.00  | 0.00     | 0.00 | 0.00 |                                         |                 |
| Increasing |       |       |       |          |      |      | 0.75                                    | 571 (9.3)       |
| Intercept  | 3.72  | 3.24  | 4.20  | 2.88     | 2.05 | 3.70 |                                         |                 |
| Slope      | -0.05 | -0.32 | 0.23  | 0.00     | 0.00 | 0.00 |                                         |                 |
| Quadratic  | 0.07  | 0.04  | 0.10  | 0.00     | 0.00 | 0.00 |                                         |                 |
| Decreasing |       |       |       |          |      |      | 0.77                                    | 486 (7.9)       |
| Intercept  | 8.98  | 8.40  | 9.56  | 3.20     | 2.40 | 3.98 |                                         |                 |
| Slope      | -1.54 | -1.86 | -1.22 | 0.00     | 0.00 | 0.00 |                                         |                 |
| Quadratic  | 0.12  | 0.08  | 0.15  | 0.00     | 0.00 | 0.00 |                                         |                 |
| Mid-peak   |       |       |       |          |      |      | 0.71                                    | 316 (5.2)       |
| Intercept  | 2.99  | 2.09  | 3.89  | 1.06     | 0.14 | 1.98 |                                         |                 |
| Slope      | 2.35  | 1.73  | 2.96  | 0.00     | 0.00 | 0.00 |                                         |                 |
| Quadratic  | -0.27 | -0.33 | -0.20 | 0.00     | 0.00 | 0.00 |                                         |                 |
| Canada     |       |       |       |          |      |      |                                         |                 |
| Parameter  | Mean  | LCI   | UCI   | Variance | LCI  | UCI  | Average probability of group membership | Sample size (%) |
| Low-stable |       |       |       |          |      |      | 0.86                                    | 2380 (64.9)     |
| Intercept  | 2.71  | 2.49  | 2.92  | 0.00     | 0.00 | 0.00 |                                         |                 |
| Slope      | -0.33 | -0.43 | -0.22 | 0.00     | 0.00 | 0.00 |                                         |                 |
| Quadratic  | 0.02  | 0.01  | 0.03  | 0.00     | 0.00 | 0.00 |                                         |                 |
| Increasing |       |       |       |          |      |      | 0.70                                    | 342 (9.3)       |
| Intercept  | 5.12  | 4.29  | 5.96  | 3.59     | 1.92 | 5.26 |                                         |                 |
| Slope      | -0.83 | -1.39 | -0.27 | 0.00     | 0.00 | 0.00 |                                         |                 |
| Quadratic  | 0.13  | 0.07  | 0.19  | 0.00     | 0.00 | 0.00 |                                         |                 |
| Decreasing |       |       |       |          |      |      | 0.74                                    | 700 (19.1)      |
| Intercept  | 7.86  | 6.82  | 8.90  | 2.98     | 1.13 | 4.83 |                                         |                 |
| Slope      | -1.35 | -1.91 | -0.79 | 0.00     | 0.00 | 0.00 |                                         |                 |
| Quadratic  | 0.09  | 0.03  | 0.14  | 0.00     | 0.00 | 0.00 |                                         |                 |
| Mid-peak   |       |       |       |          |      |      | 0.77                                    | 244 (6.7)       |
| Intercept  | 4.19  | 3.18  | 5.20  | 1.28     | 0.72 | 1.83 |                                         |                 |
| Slope      | 1.73  | 0.65  | 2.80  | 0.00     | 0.00 | 0.00 |                                         |                 |
| Quadratic  | -0.23 | -0.36 | -0.10 | 0.00     | 0.00 | 0.00 |                                         |                 |

Note: LCI/UCI = lower and upper bounds for 95% confidence interval. This table was published in the Journal of Adolescent Health, Vol. 68, Minh, A., Bültmann, U., Reijneveld, S. A., van Zon, S. K. R., & McLeod, C. B. Childhood Socioeconomic Status and Depressive Symptom Trajectories in the Transition to Adulthood in the United States and Canada. 161-168. Copyright Elsevier (2021).
